# Let's just ask them. Perspectives on urban dwelling and air quality: a cross-sectional survey of 3,222 children, young people and parents

Rachel Juel<sup>1</sup>, Sarah Sharpe<sup>1</sup>, Roberto Picetti<sup>1</sup>, James Milner<sup>1</sup>, Ana Bonell<sup>2-3</sup>, Shunmeyer Yeung<sup>2-3</sup>, Paul Wilkinson<sup>1</sup>, Alan D Dangour<sup>1</sup>, Robert C Hughes<sup>1,2</sup>

Corresponding author: Robert C Hughes: [robert.hughes@lshtm.ac.uk](mailto:robert.hughes@lshtm.ac.uk)

Centre on Climate Change and Planetary Health<sup>1</sup>  
MARCH Centre<sup>2</sup>  
Clinical Research Department<sup>3</sup>  
London School of Hygiene & Tropical Medicine  
Keppel Street, London  
United Kingdom WC1E 7HT

Word Count: 3702

## CONTRIBUTION STATEMENT

The concept and design of this project was led by Rachel Juel, Dr. Robert Hughes and Professor Alan Dangour. Substantial contributions to the design of the work, acquisition, analysis and interpretation of data were made by the rest of the team (Sarah Sharpe, Roberto Picetti, James Milner, Shunmeyer Yeung, and Paul Wilkinson).

The first draft of the manuscript was produced by Rachel Juel, with substantial revisions provided by the rest of the team (Robert Hughes, Alan Dangour, Sarah Sharpe, Roberto Picetti, James Milner, Shunmeyer Yeung, and Paul Wilkinson).

All authors agreed upon the final version of the manuscript to be published and all agreed to be accountable for all aspects of the work, thus ensuring that questions related to the accuracy or integrity of the work were appropriately investigated and resolved prior to submission.

## FUNDING

This work was supported by Fondation Botnar [OOG-21-006].

## COMPETING INTERESTS

The authors declare no associations (financial or other-wise) with any commercial entities that have interests in the research completed in this manuscript. RCH has worked as a paid adviser to charities The Children's Investment Fund Foundation and Clean Air Fund.



## ABSTRACT

**Introduction:** 93% of all children in the world breathe dangerously polluted, and urban children in low- and middle- income countries (LMICs) are especially affected. This air pollution is one part of a broader climate crisis that threatens to undermine the health of the next generation. Despite young people being increasingly engaged in these issues, their perceptions concerning air pollution (AP) and urban environmental health more broadly have not been well documented.

**Methods:** The Children, Cities and Climate (CCC) project used targeted social media adverts to recruit children, young people, parents and expectant parents (CYPP) to complete an online survey with a combination of open and closed questions in order to collect perceptions about air quality in their home cities, the main sources of AP, and how they would improve their cities.

**Results:** The survey was completed by 3,222 CYPP in 59 of the most polluted cities in 14 countries. Nearly two in five (39%) CYPP cited AP as one of the worst things about their city, with motor transport perceived as the main contributor. CYPP reported differing views on whether their cities were becoming better (43%) or worse (34%) places to live (33% reported it was 'staying the same'). Numerous specific ideas to improve cities and urban air quality emerged, alongside an emphasis on also addressing structural barriers to change. A clear set of principles that should guide how city leaders act was also described, including the need to engage with young people meaningfully.

**Conclusions:** CYPPs articulated good and bad experiences of urban living and perceived AP and traffic as pressing concerns. They provided a clear set of suggestions for improving their cities. Further efforts to engage young people on these issues are warranted.

## **KEY MESSAGES**

### **What is already known on this topic**

The health of children and young people is greatly impacted by air pollution and in many cities, especially those in low- and middle-income countries, this problem is increasing as the cities industrialise. Children and young people are rarely consulted on issues of air pollution or urban design (especially outside of high-income countries), despite their lived experience of air pollution. At the same time, growing numbers of young people are engaging in environmental advocacy and activism.

### **What this study adds**

Air pollution, and motor traffic, are ranked by children, young people and parents who responded to our survey as some of the worst aspect of urban living. At the same time, young people have numerous ideas for how these problems can be addressed, including both specific ideas for interventions and also cross-cutting underlying issues that need to be tackled, including poverty and poor governance.

### **How this study might affect research, practice or policy**

The lived experiences reported by these urban young people and subsequent recommendations, should be considered in policy making and priority setting in cities around the world, particularly the most polluted cities in low- and middle-income urban settings. In addition, this research demonstrates the value of and an efficient approach to engaging with children, young people and parents directly; something that should be done more frequently on all matters that apply to them including urban policy making.

## INTRODUCTION

The 2020 State of Global Air report found 100% of the world's population lived in areas that exceeded the recently tightened 2021 WHO air quality guidelines for fine particulate matter pollution (PM<sub>2.5</sub>) (1). These levels of air pollution (AP) pose serious health risks to children, and may reduce the life expectancy of a child born in 2019 by up to 12 months (compared to children born in the absence of PM<sub>2.5</sub> exposure) (2).

Young people in urban areas are especially affected by AP (3). As urbanisation accelerates, pollution is expected to increase, particularly in low- and middle-income countries (4). Children currently represent 30% of the four billion people living in cities, but this will rise to 70% of 6.7 billion by 2050 (5). Additionally, many of the sources of AP contribute to climate change, the effects of which children today will experience throughout their lives (6).

While the environmental and health impacts associated with AP exposure are increasingly well understood (7), little is known about how children, young people, parents and expectant parents (CYPP) perceive their urban environment and the quality of air in their cities. Additionally, the ideas and expectations of CYPP for improving urban air quality are under-explored (8–11).

This research aimed to capture and synthesise the views of CYPP about the cities where they live, with a specific focus on AP, in order to support the generation of evidence-informed policy that reflects CYPP's perspectives, ultimately contributing to the development of child-centered, healthier, sustainable cities.

## METHODS

This cross-sectional study collected data through an online survey. The survey was available to CYPP from any city in the world, though targeted recruitment (through paid social media advertisements – Supplementary Appendix 1) was directed to CYPP in 16 major cities (Bhubaneswar, Dar es Salaam, Dhaka, Free Town, Glasgow, Harare, Jaipur, Lahore, London, Los Angeles, Mexico City, Milan, Nairobi, Quezon City, Quito, Tamale). These cities were chosen to reflect a variety of global settings, population sizes, and levels of development in both the Global North and South, and to include the hosts of the 2021 COP26 Summit (Glasgow and Milan). Eligibility for inclusion in the survey required respondents to currently live in a town or city, be aged between 13 and 25 years old, or be a parent or expectant parent to a child aged <13 years old. Detailed methods for population recruitment, pretesting methods, and data handling can be found in Supplementary Appendix 2.

### Data collection

The survey instrument (Supplementary Appendix 3) was designed and hosted on Typeform (12), an online survey platform. Respondents self-selected their preferred language (from 10 options) and completed three demographics questions to check eligibility and city location. The survey questions included: 5 'closed' multiple choice

questions to identify the ‘best’ and ‘worst’ parts of their cities (with the option to submit their own answer via an ‘other’ choice); to rank their city’s air quality on a Likert scale (13) from zero (‘awful & toxic’) to ten (‘amazing & fresh’); to suggest the main sources of AP in their city; and to indicate if they felt their city was becoming a better or worse place to live. Six ‘open-ended’ questions collected long-form comments about the CYPP’s cities in general and the quality of the air. CYPP were asked to elaborate on previous answers and how they would improve their cities generally for young people and specifically regarding air quality.

## Missing Data

Only respondents with full demographic data who met the eligibility criteria, consented, and successfully completed the survey were included in the full survey sample. An available case analysis method was used for each survey question, ensuring each question sub-population consisted of complete responses only. The demographics of subpopulation respondents were compared to the full sample’s demographics to identify any patterns of item non-response.

Where possible, imputation methods were used to limit non-response bias for demographic data, age and location. Where age was not reported or reported as an unrealistic value in excess of 100 or less than 13 years old, age was recoded as ‘missing’ and survey respondents were analysed together. Where location was not reported or only reported by region or country, probable location was imputed.

## Data analysis

The data analysis plan (available on Data Compass (14)) was developed in advance of data collection. Where there were fewer than five responses from an individual city, these were clustered based on location linked to the advertisement they responded to. Countries were categorised as high or middle and low income as identified by the Organisation for Economic Co-operation and Development (15). Parents (n=509) and expectant parents (n=283) were combined in analyses. Where relevant, ‘other’ responses to closed questions were coded against existing options, and when appropriate options didn’t exist in the survey instrument, answers were analysed thematically with the other qualitative answers.

Analysis of the quantitative data was completed using write Stata Statistical Software: Release 17 (College Station, TX: StataCorp LLC). The demographics (age and target group) of the full sample and each subpopulation by question were described using averages and frequencies. The sample was stratified using these demographics prior analysis of the quantitative questions. Responses to multiple choice questions were summarised using frequencies while the Likert scale responses were reported using the mean and standard deviation.

Responses to the qualitative questions were analysed together using an interpretive grounded theory approach. Free text responses were translated into English by RJ using Google Translate and were not edited for grammar or punctuation. Quotations that included identifiable information were redacted before analysis. These responses were coded (by RJ) in NVivo 12 (16) using initial open coding methods to identify and group important words or groups of words, with a focus on the underlying meaning of responses.

Coding was regularly discussed and reviewed with RH, who also reviewed open-ended questions. Where possible, in-vivo codes were used to capture the participant's words as representative of a broader concept. Intermediate codes were created to identify core categories drawing on initial coding. Analysis was undertaken simultaneously with data coding to look for emerging concepts and groups of themes through a series of meetings between RJ and RH, and the wider team. RJ and RH are both public health and climate change researchers. RH's particular expertise is in AP and early childhood development, while RJ focuses on food systems and planetary health. The expertise of the wider team comprises pediatric medicine, epidemiology, mathematical modelling, maternal health, and research communications. Where data saturation became apparent and no new codes or groupings of codes were identifiable, coding was ceased. Finally, a conceptual framework was developed to synthesise the themes and sub-themes which emerged.

### **Ethical approval**

Ethical approval was granted by the LSHTM Research Ethics Committee (LSHTM Climate change, cities, child and young people's health: children and young people survey and engagement, reference 26313). In addition, municipal authorities in all 16 focal cities were informed about the planned survey and were invited to provide feedback and offered a briefing on the results.

### **Patient and public involvement**

This project involved local collaborators in Kenya and Dar Es Salaam. Our partner in Kenya and Dar Es Salaam, Shujaaz Inc., contributed to survey method pretesting and translation into the Sheng local dialect of Swahili. They additionally contributed to recruitment to our online survey, through neutral pushes to their viewer-base. Finally, they assisted in dissemination of research findings throughout East Africa and at a variety of events hosted by LSHTM. Additional collaborations involved the Zimbabwe LSHTM Research Partnership, and a group of young people throughout the world. These collaborations similarly occurred during the research dissemination, with partners contributing to several LSHTM panel-events both in-person in the United Kingdom at the COP26 and COY16 climate change conferences and online.

## **RESULTS**

In total 3,808 eligible and consenting participants were recruited to the study and 3,222 (85%) of these completed the online survey. On average, respondents clicked on the survey link after 4.3 views of a recruitment advertisement, but this ranged from an average of 1.3 views in London, UK to 17.1 views in Freetown, Sierra Leone. The median survey completion time was 8.7 minutes (range: 0.5 - 458.8 minutes).

The survey respondents reported being from 14 different countries and 59 cities (Figure 1, Supplementary Appendices 5 and 6). Most responses (in part due to how the advertisement targeting algorithm prioritised lower cost per click markets) were from highly polluted cities in low- and middle-income countries (Supplementary Appendix 7). The mean age of children and young people sample was 20 (SD 3.45), and amongst parents/expectant parents was 34 (SD 9.25); 75% of all respondents (n=2,430) were young people aged 13-25 years old; 16% (n=509) were parents of children aged <13; and

9% (n=283) were expectant parents; this did not differ for any question's subpopulation (Supplementary Appendix 8).

A flow-chart of sample formation can be found in Figure 2.

Figure 1: Distribution of survey responses by self-reported city (n=59)

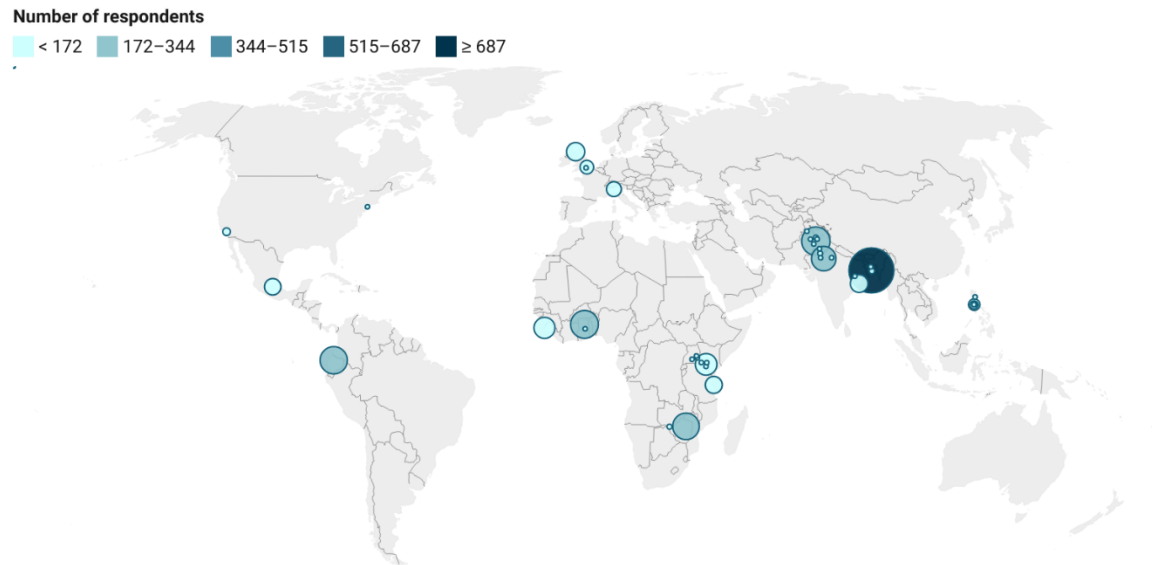



Figure 2: Creation of full sample and subpopulations

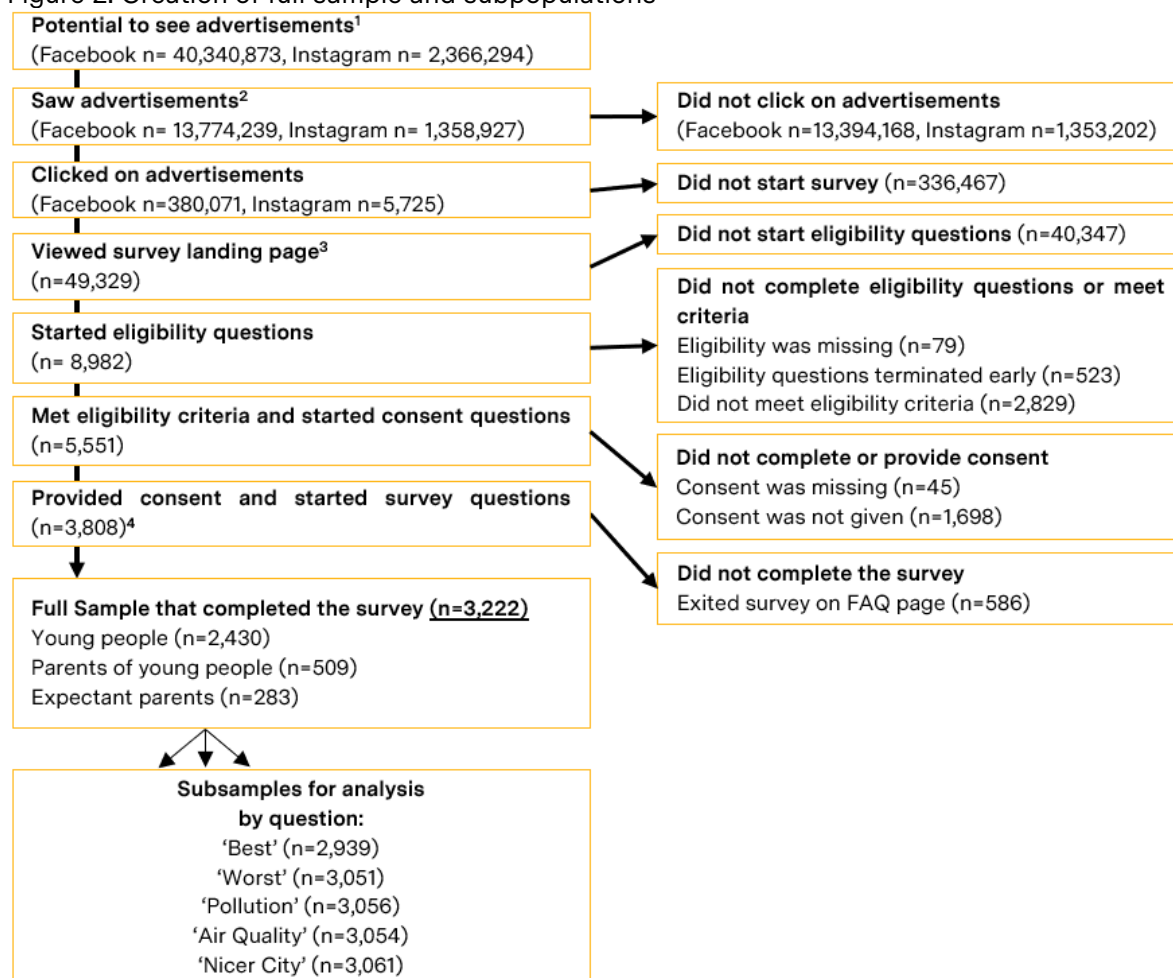

<sup>1</sup> The number of individual social media users on each platform that fit the desired demographics of the target population and could be *potentially* shown the advertisement during the paid advertising campaign

<sup>2</sup> The number of social media users on each platform that were *actually shown* an advertisement during the campaign

<sup>3</sup> The number of social media users that clicked on the advertisement on either social media site and were successfully transferred to the survey landing page on Typeform.com to begin eligibility and consent questions. Not all social media users targeted by the paid advertising campaign were eligible or gave consent to participate in the survey

<sup>4</sup> The number of eligible and consenting survey participants who could *potentially* complete the full survey.

## Overall perceptions about their cities

Initially, respondents were asked about their cities in general, followed by specific questions on air quality. The most common “best” aspects reported were proximity to family (reported by 30%); the diversity of activities (27%); and proximity to school or work (27%); the most common “worst” things were traffic congestion (reported by 49%); pollution (39%); and a shortage of work opportunities (23%) (Figure). No trends were observed when the best and worst aspects of cities were stratified by age, PM<sub>2.5</sub> quartile, or respondent group (Supplementary Appendices 9 and 10). 43% of the sample reported that their cities were “improving”, 23% said there was no change and 34% reported their cities were getting worse (Supplementary Appendix 11).

Figure 3: The percentage of n=2,939 and n=3,051 respondents that reported each item within the top 3 'best' and 'worst' aspects of their cities

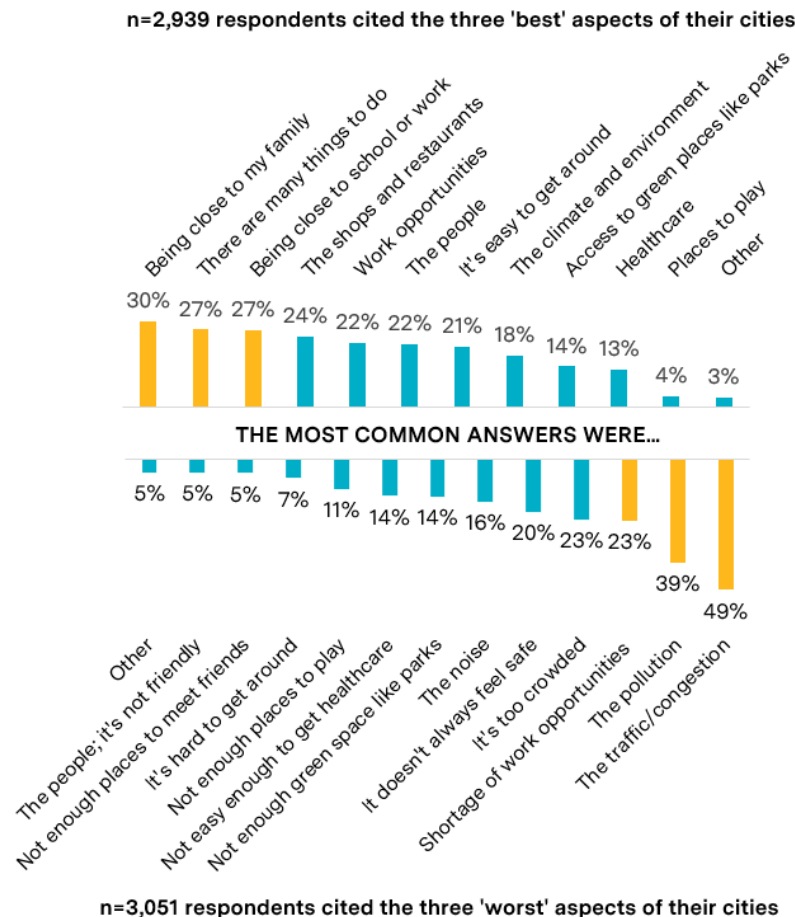

### Perceptions on air quality and major causes of AP

The mean air quality rating (on a scale of 0 ('awful & toxic') to 10 ('amazing & fresh')) reported by 3,054 respondents was 5.1 (sd 2.9). There was no obvious association between self-rated air quality and quartile of air quality of cities; the mean score in the least polluted cities was 4.71 (SD 2.9) and in the most polluted was 6.01. No trends were identified when stratifying by age or respondent group (Supplementary Appendix 12).

The most commonly reported sources of AP were motor transport, factories, rubbish burning and construction/building work. Agriculture/farming, household cooking and household heating were all reported by smaller proportions of respondents (2%, 5% and 5% respectively); all considerably lower than AP blown in from outside the city (8%). 'Other' responses included natural sources such as dirt and dust, but were mostly based on human actions (burning of waste/sewage) and specific man-made objects (aeroplanes, plastic shopping bags). No clear patterns were identified when stratifying the major sources of AP by PM<sub>2.5</sub> quartile, major city, eligibility criteria, or age of respondent (Supplementary Appendix 13).

### **Thematic analysis of open-ended questions**

Three sets of themes emerged from the analysis of qualitative survey responses. An overall summary of the three themes and their respective subthemes is illustrated in Figure

.

Figure 4: Summary of the thematic analysis findings

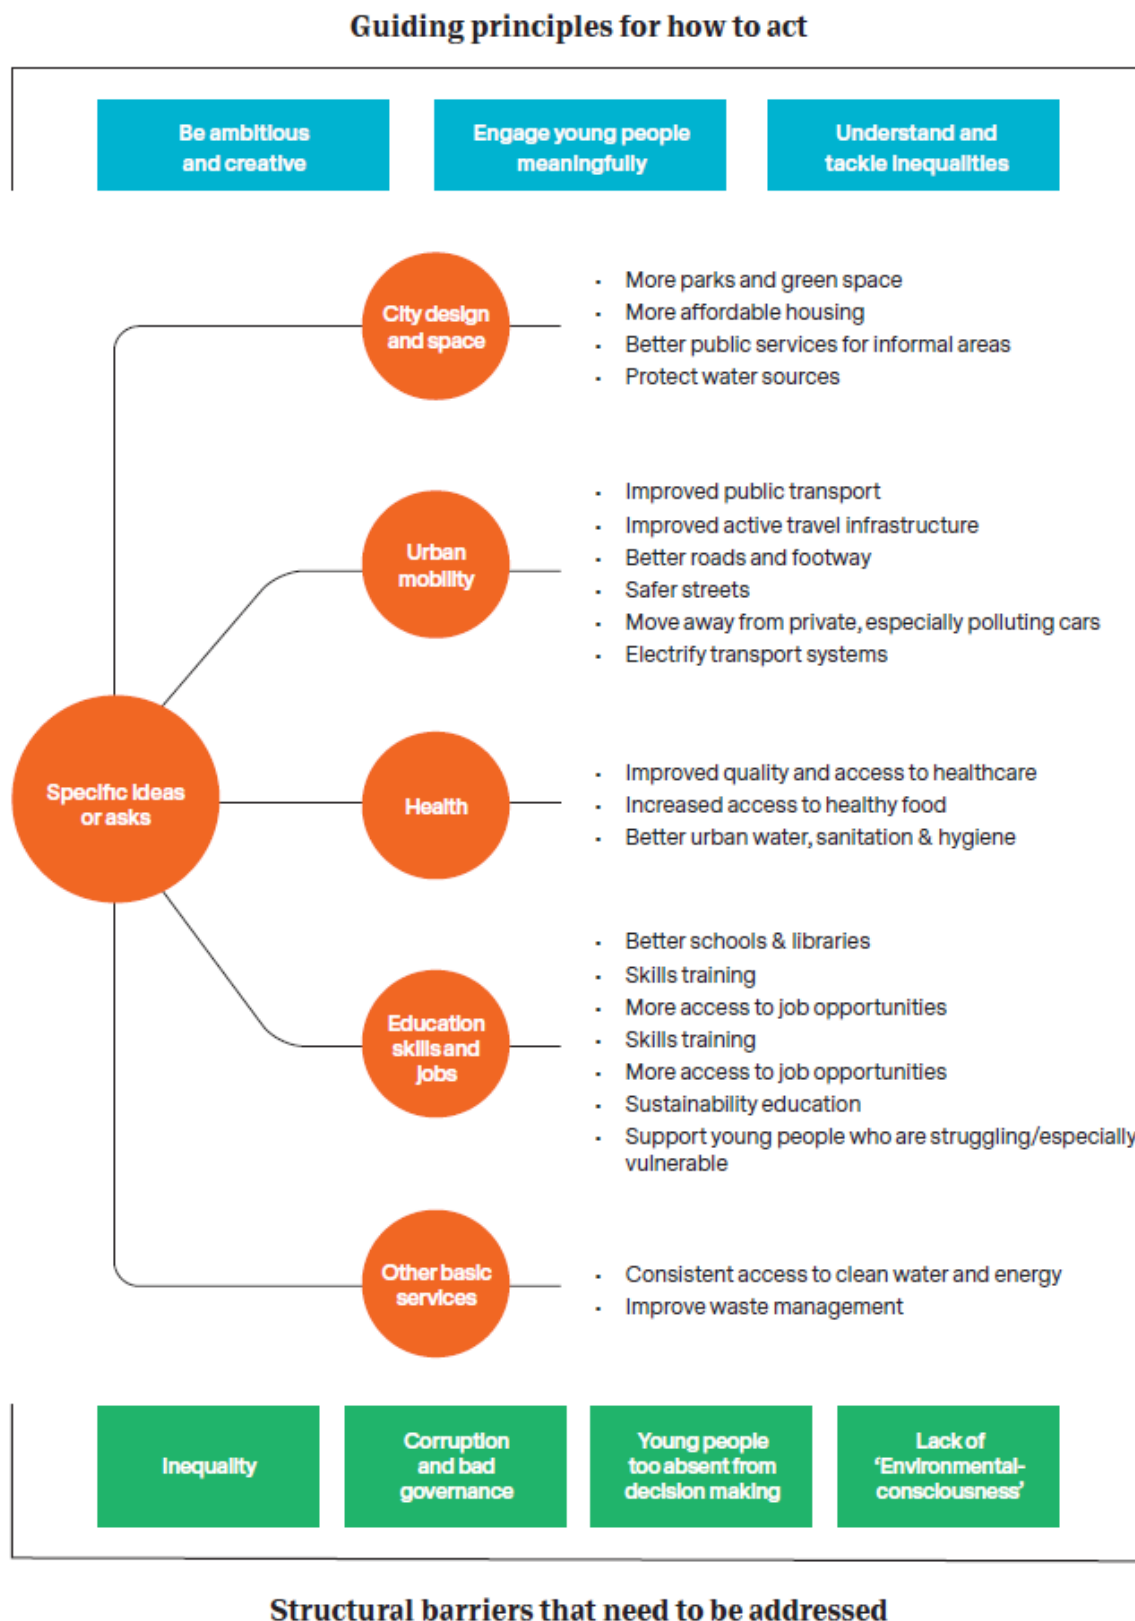

The first theme that emerged was a set of **specific ideas or asks** representing distinct changes or policy priorities to curb AP and improve cities more generally for young people. Sub-themes identified included ‘city design and space’, ‘urban mobility’, ‘health’, ‘education’, ‘skills and jobs’, and ‘other basic services’. The breakdown of these ideas into sectors with exemplary quotes is provided in Supplementary Appendix 14.

A second emerging theme concerned **structural barriers that need to be addressed** before these specific ideas and asks can be achieved. These subthemes were felt to represent broader, more fundamental issues faced by cities and were ‘inequality’, ‘corruption and bad governance’, ‘lack/absence of young people in decision making’, and ‘a lack of consciousness for the environment’, listed with illustrative quotes in Supplementary Appendix 15.

The third set of themes described **Guiding principles for how to act** to address the structural barriers and to achieve the specific ideas and asks of urban young people. These principles were to ‘be ambitious and creative’, ‘engage young people in meaningful ways’, and to ‘understand and tackle inequalities’. Illustrative quotes for each of these are included in Box.

Box1: Illustrative quotes of guiding principles for *how* to act, by subtheme

#### **Ambitious and creative**

*“I would also have wifi hotspots citywide for children and young people who have no access to wifi at home so that they can complete work and not fall behind.”*

*“build arcades, amusement parks etc. Just want them to enjoy and prosper in life.”*

*“Plants 🌱🍀 on the each rooftop”*

#### **Engage young people meaningfully**

*“consider the opinions of the children and young people to facilitate development in our country”*

*“I really hope the government will embrace the opinions from us, the children and young people...”*

#### **Understand and tackle inequality**

*“The rich don't care about the poor, and the high ranking politicians don't care for the masses as well but only their families, which is 95% leading to corruption, wherein they don't give job to the capable graduated ones except their love ones and families from the same ruling party”*

*“I'd hopefully like to make an equal society where there is mutual respect for everyone”*

*“Positive change needs to happen now. Joined up thinking, to implement a masterplan that takes the whole city forward, rather than the occasional isolated success story”*

## DISCUSSION

In this survey, urban children, young people and parents in this survey provided important insights into the lived experience in their cities. Commonalities of the ‘best’ and ‘worst’ aspects of cities emerged, and were consistent across all respondent groups, stratified by age and PM<sub>2.5</sub> quartile. No clear majority was reached about the state of change in cities; respondents both felt their cities were improving and becoming worse. A common theme amongst those who responded to our survey was a high level of concern about AP, often accompanied by a broad set of ideas for how urban air quality could be improved. Additional recommendations were made to improve cities more generally for children and young people. To achieve these improvements, several notable barriers were identified that must be addressed, and a set of principles were developed to guide decision maker’s actions.

### **Strengths of this study**

The use of social media recruitment and online surveying garnered a large number of responses, from a broad variety of cities. A combination of closed and open-ended questions allowed both quantitative and qualitative insights to be drawn, enabling us to explore where AP sits amongst a broader set of concerns and a rich set of underlying themes and ideas.

Recruitment through social media may have allowed for the inclusion of people who are not easily recruited through ‘analogue’ methods or are often systematically excluded from research panels (e.g. under 18, lower income, lower consumption groups). Additionally, the online survey instrument could be directly completed by young people, rather than by their parent/carer, or their school which limited misclassification of ideas which may occur when provided by a proxy adult.

The survey instrument was available for completion in 10 languages and was optimised using iterative pre-testing and translation checking by native speakers. The selected languages enabled global participation, as they are spoken as a first language by 40% of the global population, and are all (excluding Swahili) in the top 22 most commonly spoken languages worldwide (17).

### **Limitations**

Selection bias is likely to have occurred due to a combination of factors. Firstly, using online recruitment data collection systematically excludes those who do not have access to the internet, a computer or mobile device, and those who do not use social media platforms, meaning that our sample may have been biased towards more affluent people who can afford to be online and utilise such devices, and those who spend more time on social media.

Secondly, the costs per click for online recruitment advertisements varied by location, and those areas with lower cost per click were disproportionately advertised to due to the algorithms employed by the social media networks (despite attempts to mitigate this). The

sample is therefore biased towards low- and middle-income countries, more polluted cities and especially those in South Asia (48% of the sample was from South Asia and over half the South Asian population from Dhaka, Bangladesh). Although the recruitment adverts were deliberately ‘generic’, aiming to appeal to all CYPP living in the city and the survey was short to reduce the risk of drop out, the topic of the survey is likely to have appealed more to certain groups of people (those who are interested in the climate/environment/urban living/child health).

Finally, though young people were involved in the development and pre-testing of the survey questions and discussion and dissemination of the results, they were not involved in the formal analysis or write up of the survey results.

### **Putting this study into context**

This survey was one of the largest, most geographically diverse of its kind, seeking to highlight the perspectives of global CYPP on urban living and AP. Several surveys were identified that more generally sought out the priorities of urban youth for improving how they live, work and play in cities (8–11), though none of these surveys explicitly sought CYPP perspectives on the air they breathe, or their recommendations for improving their city’s air quality. Additionally, though several of these surveys were comparable in size (8–10) (n=1,000, n=2,002, and n=9,000 respectively), only two included the voice of CYPP in LMIC’s (10,11), and neither provide a rich narrative of the challenges faced by CYPP in LMIC’s nor specific and discernable recommendations.

One survey of 1000 young people aged 12-19 in London identified some similar priorities for city improvements, including creating “car free streets” and “more beautiful and green places” (8) both of which emerged from our study also. In another survey of 2,002 young people aged 16-24 in London, 30% of respondents ranked AP in the top three most pressing issues to be addressed by their local authority (9). AP was the fourth most prioritized issue out of all social, environmental, and economic issues. Within the environmental issues, improving air quality was the second-most prioritised issue, following only improvements in recycling and waste reduction. Although these young people prioritised environmental issues and independently demonstrated a level of environmental consciousness, they also noted the need for increased environmental education, corroborating a systemic lack of environmental consciousness remains a barrier that needs to be addressed in cities.

A global survey of 9,000 young people aged 15-29 highlighted some themes consistent with our survey, most notably the importance of promoting environmental awareness alongside delivery of specific policies (10). Another study that included both LMICs and HICs, identified similar barriers young people aged 12-24 face to living sustainably to those reported in our survey. These included growing inequality and poor availability of public services and safe, efficient public transport (10).

### **Implications of this research for policy makers**



There is obvious need for acceleration of efforts to address urban air pollution: the importance which young people place on this issue is clear. This is not surprising in the context of school closures due to extreme pollution events in South Asia (18,19). These extreme events, in combination with the known health consequences of AP, led UNICEF to declare climate change and AP to be a child's rights crisis (3)

Secondly, the rich insights and ideas shared by participants in this study suggest that policy makers should make greater effort to engage CYPP in urban and air pollution policy discussions. Both Rights-based and pragmatic arguments for this can be convincingly made given the UN Convention of the Rights of the Child (which asserts their Right to be involved in developing solutions to the challenges they face (20) and the creative ideas they report in this study).

### **Unanswered questions and future research**

Future research into this issue could employ better methods to improve sample representativeness (e.g. combining online and offline surveying with particular efforts to include marginalised communities (e.g. homeless and migrant youth and those in informal settlements)).

Additionally, richer perspectives could be gained from collecting narrative via focus groups or urban co-design workshops with CYPP in cities. Co-development and leadership of these focus groups with CYPP would allow for deeper and more genuine insights to be collected regarding the lived experience of urban children.

Finally, in this time of rapidly changing climate, future research is needed to understand the perspectives of urban CYPP on other environmental health and climate-related issues, including, for example, exposure to urban heat, different models of urban mobility and shifting urban food systems. The health and non-health effects of these shifts must also be understood, given the impact they are likely to have on the health of the next generation.

### **CONCLUSION**

Young people (and parents) living in cities around the world clearly articulate both what is good, and what is bad, about growing up and living in their city. Subsequently, these 16 cities were not consistently reported as becoming 'better' or 'worse' places to live. Many beneficial qualities of urban living were noted, particularly proximity to family, though those AP and traffic were perceived as pressing concerns, particularly by those living in polluted cities. In addition, young people, when asked, provide a clear set of suggestions for how their cities can be improved. These recommendations were multi-sectoral, including city design, and multiple aspects of urban living. Though recommendations were specific, implementation of these ideas may be prevented by structural barriers including bad governance. Young people recommended a set of principles to guide decision makers to overcome these barriers and implement their specific ideas. Notably, young people requested to be consulted more in all matters that pertained to them. This survey attempted to involve young people in all stages of mechanism design and research dissemination, and demonstrated that online surveying can be an efficient, albeit



imperfect, way to engage young people. Further, more in-depth, efforts to engage young people on these issues are warranted.

## REFERENCES:

1. State of Global Air: A Special Report on Global Exposure to Air Pollution and its Health Impacts [Internet]. Health Effects Institute, Institute for Health Metrics and Evaluation's Global Burden of Disease project; [cited 2022 Mar 16]. Available from: [https://www.stateofglobalair.org/sites/default/files/documents/2020-10/soga-2020-report-10-26\\_0.pdf](https://www.stateofglobalair.org/sites/default/files/documents/2020-10/soga-2020-report-10-26_0.pdf)
2. State of Global Air: How does air pollution affect life expectancy around the world? [Internet]. Health Effects Institute, Institute for Health Metrics and Evaluation's Global Burden of Disease project; 2022. Available from: [https://www.stateofglobalair.org/sites/default/files/documents/2022-03/soga-life-expectancy\\_0.pdf](https://www.stateofglobalair.org/sites/default/files/documents/2022-03/soga-life-expectancy_0.pdf)
3. Young and old, air pollution affects the most vulnerable [Internet]. UNEP. 2018 [cited 2022 Feb 20]. Available from: <http://www.unep.org/news-and-stories/blogpost/young-and-old-air-pollution-affects-most-vulnerable>
4. Urban Air Pollution and Children in Low- and Middle- Income Countries [Internet]. Cities4Children. [cited 2022 Mar 24]. Available from: <https://cities4children.org/knowledgebase/urban-air-pollution-and-children-in-low-and-middle-income-countries/>
5. 2018 Revision of World Urbanization Prospects | Multimedia Library - United Nations Department of Economic and Social Affairs [Internet]. [cited 2021 Nov 3]. Available from: <https://www.un.org/development/desa/publications/2018-revision-of-world-urbanization-prospects.html>
6. United States Environmental Protection Agency. Climate Change and the Health of Children. :4.
7. Manisalidis I, Stavropoulou E, Stavropoulos A, Bezirtzoglou E. Environmental and Health Impacts of Air Pollution: A Review. Front Public Health [Internet]. 2020 [cited 2022 Mar 16];8. Available from: <https://www.frontiersin.org/article/10.3389/fpubh.2020.00014>
8. My City Too [Internet]. Open City. [cited 2021 Nov 3]. Available from: <https://open-city.org.uk/my-city-too>
9. Sloam DJ. Young Londoners' Priorities for a Sustainable City. 2019;53.
10. Urban Work Index 2019 - Youthful Cities [Internet]. [cited 2021 Nov 3]. Available from: <https://youthfulcities.com/urban-indexes/urban-work-index-2019/urban-work-index-2019/>
11. CYCLES-background-report-online.pdf [Internet]. [cited 2021 Nov 3]. Available from: <http://cusp.ac.uk/wp-content/uploads/CYCLES-background-report-online.pdf>
12. Typeform: People-Friendly Forms and Surveys [Internet]. Typeform. [cited 2021 Nov 22]. Available from: <https://www.typeform.com/>
13. Jebb AT, Ng V, Tay L. A Review of Key Likert Scale Development Advances: 1995–2019. Front Psychol [Internet]. 2021 [cited 2022 Jan 24];12. Available from: <https://www.frontiersin.org/article/10.3389/fpsyg.2021.637547>

14. LSHTM Data Compass [Internet]. [cited 2022 Feb 17]. Available from: [https://datacompass.lshtm.ac.uk/cgi/search/simple?q=&\\_action\\_search=Search&\\_order=bytitle&basic\\_srctype=ALL&\\_satisfyall=ALL&\\_action\\_search=Search](https://datacompass.lshtm.ac.uk/cgi/search/simple?q=&_action_search=Search&_order=bytitle&basic_srctype=ALL&_satisfyall=ALL&_action_search=Search)
15. UNSD — Methodology [Internet]. [cited 2022 Mar 24]. Available from: <https://unstats.un.org/unsd/methodology/m49/>
16. Qualitative Data Analysis Software | NVivo [Internet]. [cited 2021 Nov 23]. Available from: <https://www.qsrinternational.com/nvivo-qualitative-data-analysis-software/home>
17. List of languages by number of native speakers. In: Wikipedia [Internet]. 2022 [cited 2022 Feb 17]. Available from: [https://en.wikipedia.org/w/index.php?title=List\\_of\\_languages\\_by\\_number\\_of\\_native\\_speakers&oldid=1071264732](https://en.wikipedia.org/w/index.php?title=List_of_languages_by_number_of_native_speakers&oldid=1071264732)
18. Pakistan orders closure of private offices and schools in Lahore to combat toxic smog [Internet]. The Independent. 2021 [cited 2021 Nov 26]. Available from: <https://www.independent.co.uk/asia/south-asia/lahore-lockdown-pakistan-air-pollution-smog-b1964732.html>
19. Delhi pollution: All schools and colleges shut as air turns toxic - CBBC Newsround. 2021 Nov 26 [cited 2021 Nov 26]; Available from: <https://www.bbc.co.uk/newsround/59330202>
20. Convention on the Rights of the Child [Internet]. 2022 [cited 2022 Jan 18]. Available from: <https://www.unicef.org/child-rights-convention>

## ACKNOWLEDGEMENTS

Martha Jennings, Tori Griffiths, and Kirsten Dawes provided substantial support to the implementation of the project. Without them, this research could not have been completed, and we thank them for their valuable contributions. Thank you to the young people who completed the survey and shared insights into their lives, these were invaluable. Thank you to those at Empower Agency, Shujaaz Inc., YOUNGO, and all other organisations that advised and informed the design and administration of the survey and contributed to public engagement and research dissemination.

## Declaration of Interests

RCH has received grants and/or been a paid adviser to charities The Children's Investment Fund Foundation and the Clean Air Fund for work related to health effects of air pollution and climate change.
